# Supplementary material for: “Same difference”: comprehensive evaluation of four DNA methylation measurement platforms
Source: PubMed Central journal article supplement (PMC5970534; doi:10.1186/s13072-018-0190-4), 2018-05-25

## Additional file 1.

**Table S1.** Library input details.

| Sample ID               | Sample Input Concentration | pM of Library loaded in sequencer | Yield (Mbases)     | % of $\geq$ Q30 Bases (PF) | Mean Quality Score (PF) |
|-------------------------|----------------------------|-----------------------------------|--------------------|----------------------------|-------------------------|
| ERRBS_A                 | 75 ng                      | 6.5                               | 23,632             | 88.84                      | 34.51                   |
| ERRBS_B                 | 75 ng                      | 6.5                               | 26,947             | 87.47                      | 34.28                   |
| SSMethylSeqA_opt        | 3 $\mu$ g                  | 11*                               | 23,299             | 91.57                      | 35.69                   |
| SSMethylSeqB_min        | 1 $\mu$ g                  | 11*                               | 19,532             | 93.56                      | 36.33                   |
| CpGiant_A_opt           | 1 $\mu$ g                  | 12**                              | 29,385             | 84.16                      | 33.58                   |
| CpGiant_B_min           | 0.25 $\mu$ g               | 12**                              | 23,304             | 85.24                      | 33.89                   |
| TruSeqEpic <sup>1</sup> | 0.5 $\mu$ g                | 10*                               | 5,719 <sup>2</sup> | 95.39                      | 38.17                   |
| TruSeqEpic <sup>1</sup> | 0.5 $\mu$ g                | 10*                               | 5,265 <sup>2</sup> | 95.46                      | 38.19                   |
| WGBS <sup>3</sup>       | 100ng                      | 7                                 | 30,457             | 88.06                      | 34.68                   |
| WGBS <sup>3</sup>       | 100ng                      | 7                                 | 28,623             | 89.11                      | 34.98                   |
|                         |                            |                                   |                    |                            |                         |
|                         |                            | average                           | 21,616             | 89.89                      | 35.43                   |
|                         |                            | median                            | 23,468             | 88.98                      | 34.83                   |
|                         |                            | stdev                             | 9,130              | 3.99                       | 1.66                    |

\*underclustered, \*\* overclustered, <sup>1,2</sup>Yield represents  $\sim$ 33M reads since libraries were sequenced as a 4-plex as per Illumina's recommendation - for analysis purposes individual libraries were combined to achieve  $\sim$ 40x coverage, <sup>3</sup>Same library was sequenced over 2 lanes to achieve  $\sim$ 20x coverage.

**Table S2.** Target region properties and CpGs covered. Capture methods (SSMethylSeq, CpGiant and TruSeqEpic) have a predicted set of regions and CpGs covered. In practice, ERRBS can be considered a targeted method since restriction digestion produces consistent genomic fragments and, during library preparation, certain sized fragments (84-334bp) are isolated.

| Platform              | Capture region (Mbases) | Number of regions | Number of CpGs (10 <sup>6</sup> ) (single strand) | Average target CpGs covered (%) |
|-----------------------|-------------------------|-------------------|---------------------------------------------------|---------------------------------|
| CpGiant               | 80.5                    | 240,131           | 2.8                                               | 98.5 +/- 0.92                   |
| SSMethylSeq           | 84.3                    | 347,913           | 3.7                                               | 91.5 +/- 1.18                   |
| TruSeqEpic            | 107.8                   | 437,792           | 3.3                                               | 95.4                            |
| ERRBS (MspI 84-334bp) | 100.6                   | 548,203           | 3.6                                               | 67.9 +/- 0.97                   |

**Table S3.** Sequencing details. Data represents one sequencing lane on a HiSeq2500 in a High Output mode (version 3 chemistry), except for TruSeqEpic which was sequenced on a HiSeq2500 Rapid Mode.

| Sample                   | % of raw clusters per lane | # usable cluster | # Reads     | % PF  | # usable reads |
|--------------------------|----------------------------|------------------|-------------|-------|----------------|
| ERRBS A                  | 85.02                      | 20,092           | 309,997,646 | 75.48 | 233,986,223    |
| ERRBS B                  | 87.54                      | 23,589           | 331,125,710 | 80.57 | 266,787,985    |
| SSMethylSeqA_opt*        | 84.17                      | 19,611           | 250,935,060 | 91.93 | 230,684,601    |
| SSMethylSeqB_min*        | 97.09                      | 18,964           | 202,372,642 | 95.56 | 193,387,297    |
| CpGiant_A_opt**          | 83.94                      | 24,666           | 443,905,444 | 65.54 | 290,935,628    |
| CpGiant_B_min**          | 58.91                      | 13,728           | 316,245,466 | 72.96 | 230,732,692    |
| TruSeqEpic <sup>1*</sup> | 21.06                      | 1,204            | 29,276,795  | 96.71 | 28,313,588     |
| TruSeqEpic <sup>1*</sup> | 19.39                      | 1,021            | 26,955,672  | 96.69 | 26,063,439     |
| WGBS A <sup>2</sup>      | 100                        | 30,457           | 370,610,744 | 81.37 | 301,565,962    |
| WGBS A <sup>2</sup>      | 100                        | 28,623           | 329,670,820 | 85.96 | 283,385,037    |
|                          |                            |                  |             |       |                |
| average                  | 73.7                       | 18,196           | 261,109,600 | 84.3  | 208,584,245    |
| median                   | 84.6                       | 19,851           | 313,121,556 | 83.7  | 232,359,458    |
| stdev                    | 30.6                       | 10,219           | 138,470,127 | 10.9  | 101,147,156    |

\*underclustered, \*\*overclustered, <sup>1</sup>Note, The TruSeqEpic lane was sequenced according to the manufacturers instructions which resulted to ~20x coverage. For analysis, the two individual libraries were combined to achieve ~40x coverage to make it consistent with the other platforms, <sup>2</sup>Same library was sequenced over 2 lanes to achieve ~20x coverage.

**Figure S1. A) Mean CpG-unit coverage, B) Median CpG-unit coverage, C) Number of CpG-units covered, D) Distribution of coverage per CpG-unit.**

## Figure S1

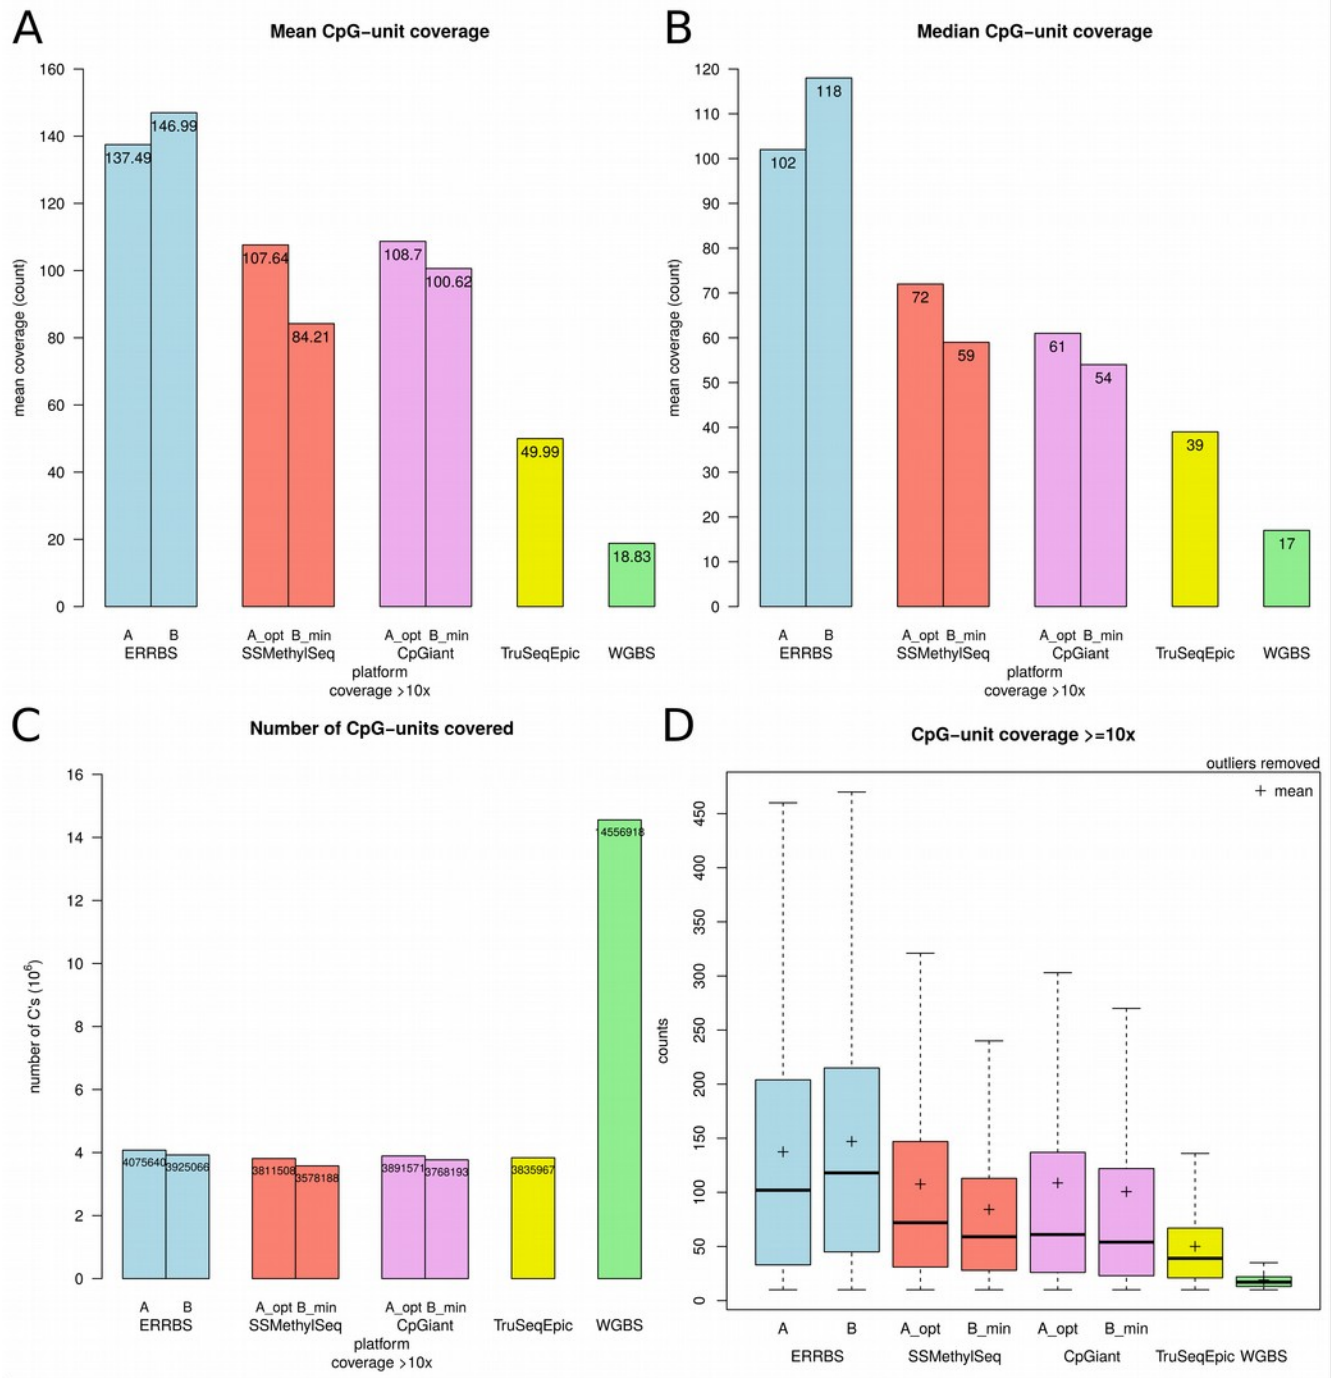

Figure S2

**Figure S2.** Intra- and Inter- platform CpG-unit overlap and methylation levels concordance.

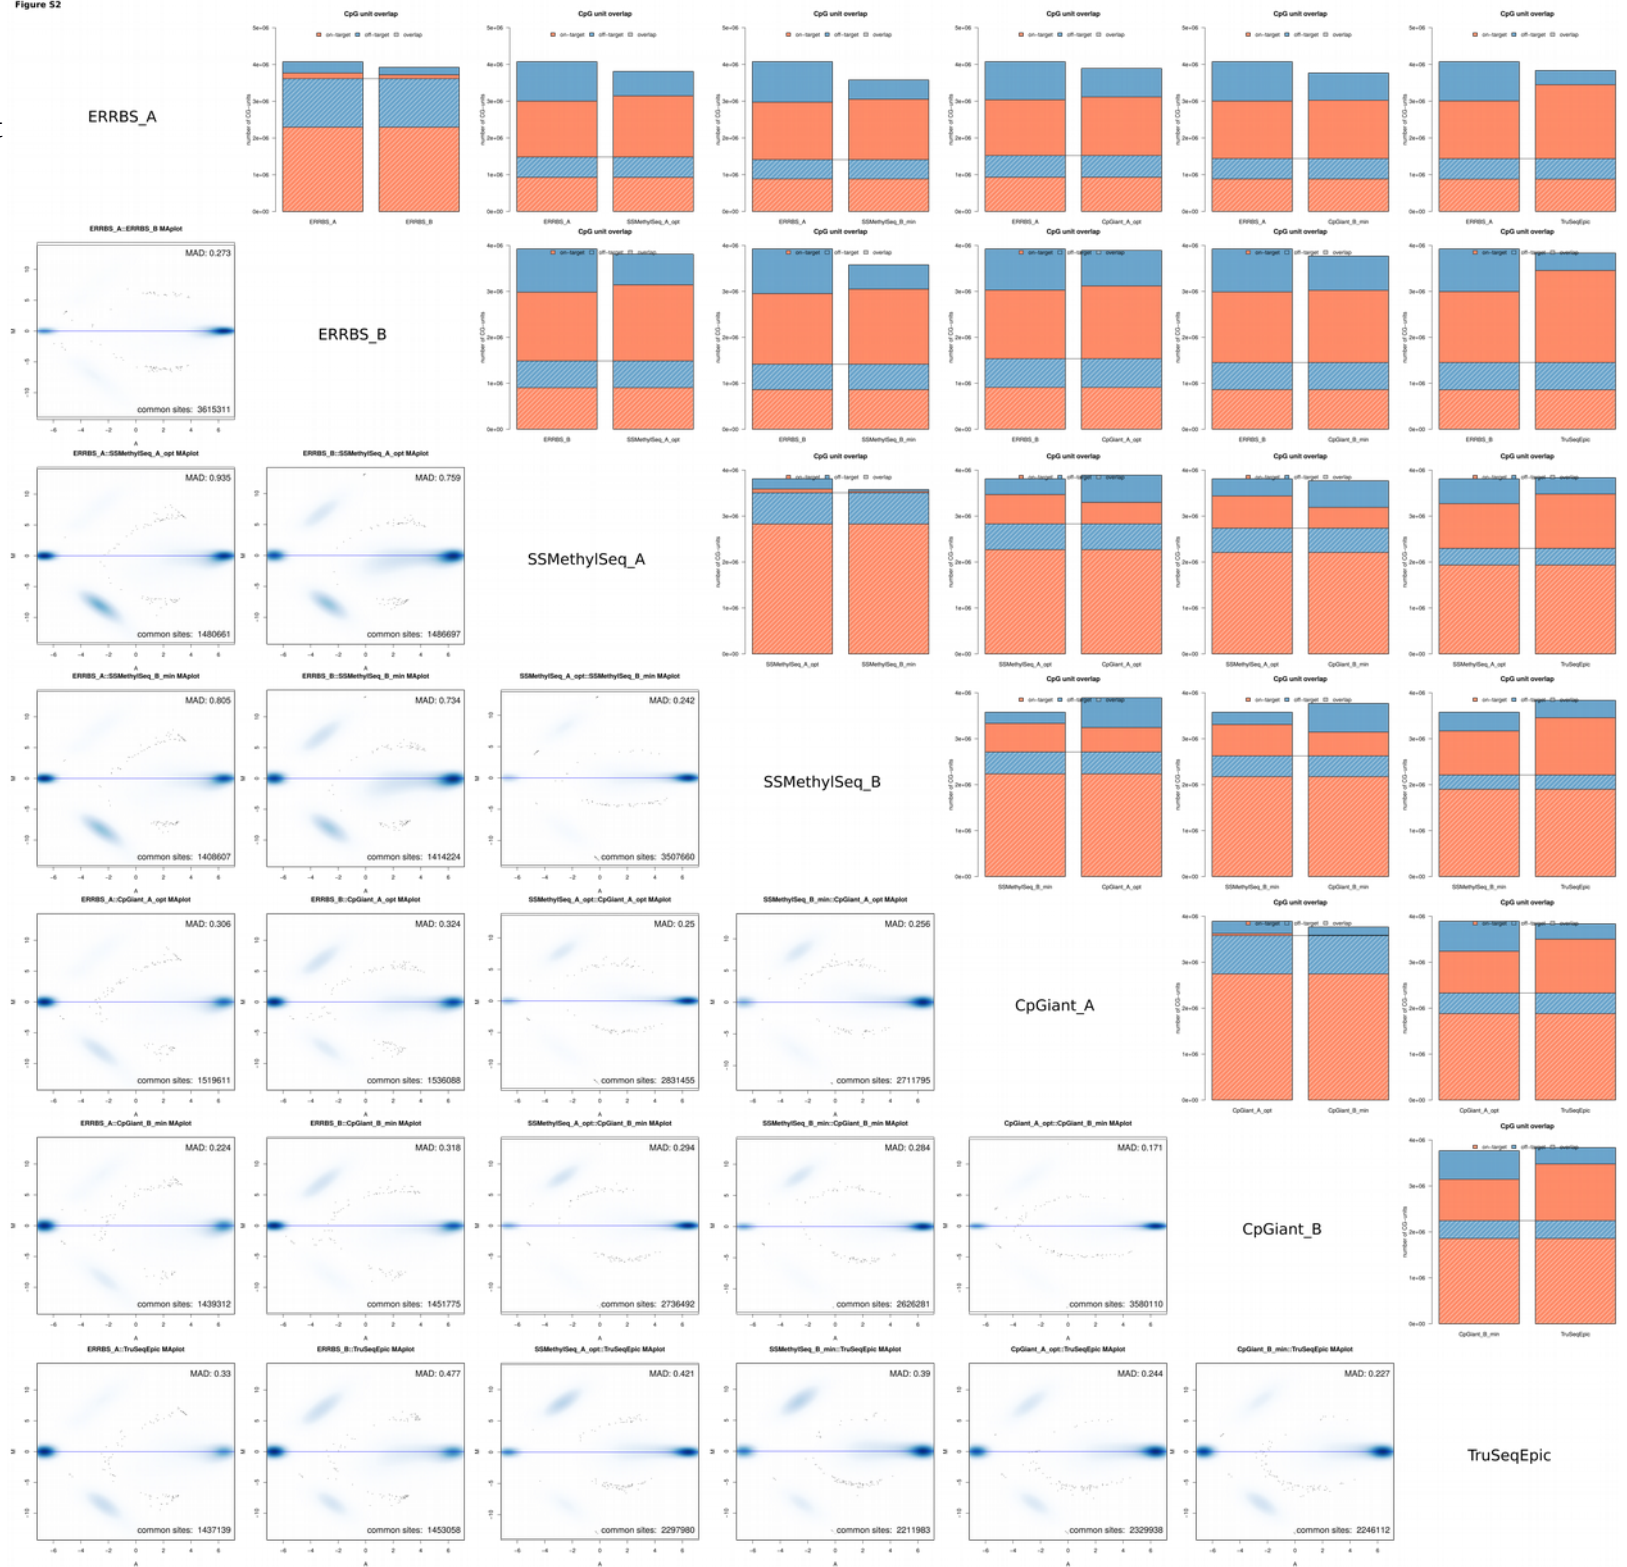

**Table S4.** Intra- and Inter- platform details. Columns of table: Total number of CpG-units for datasets A and B, number of shared CpG-units between datasets A and B (common), percent of sample dataset for datasets A and B, MAD value, Pearson correlation, Spearman correlation, interquartile range (IQR), and root-mean-square deviation (RMSD).

| SampleA::SampleB                     | Total A   | Total B    | Common    | Percent A | Percent B | Pearson | Spearman | MAD   | IQR   | RMSD |
|--------------------------------------|-----------|------------|-----------|-----------|-----------|---------|----------|-------|-------|------|
| ERRBS_A::ERRBS_B                     | 4,075,640 | 3,925,066  | 3,615,311 | 88.71     | 92.11     | 0.942   | 0.928    | 0.273 | 0.450 | 13.3 |
| ERRBS_A::SSMethylSeq_A_opt           | 4,075,640 | 3,811,508  | 1,480,661 | 36.33     | 38.85     | 0.895   | 0.819    | 0.935 | 6.560 | 17.5 |
| ERRBS_A::SSMethylSeq_B_min           | 4,075,640 | 3,578,188  | 1,408,607 | 34.56     | 39.37     | 0.893   | 0.814    | 0.805 | 5.510 | 17.5 |
| ERRBS_A::CpGiant_A_opt               | 4,075,640 | 3,891,571  | 1,519,611 | 37.29     | 39.05     | 0.897   | 0.843    | 0.306 | 0.951 | 17.3 |
| ERRBS_A::CpGiant_B_min               | 4,075,640 | 3,768,193  | 1,439,312 | 35.31     | 38.20     | 0.888   | 0.843    | 0.224 | 0.539 | 18.2 |
| ERRBS_A::TruSeqEpic                  | 4,075,640 | 3,835,967  | 1,437,139 | 35.26     | 37.46     | 0.888   | 0.795    | 0.330 | 0.988 | 16.8 |
| ERRBS_A::WGBS                        | 4,075,640 | 14,556,918 | 2,868,834 | 70.39     | 19.71     | 0.810   | 0.792    | 0.402 | 0.848 | 26.7 |
| ERRBS_B::SSMethylSeq_A_opt           | 3,925,066 | 3,811,508  | 1,486,697 | 37.88     | 39.01     | 0.938   | 0.854    | 0.759 | 1.510 | 13.5 |
| ERRBS_B::SSMethylSeq_B_min           | 3,925,066 | 3,578,188  | 1,414,224 | 36.03     | 39.52     | 0.936   | 0.847    | 0.734 | 1.300 | 13.6 |
| ERRBS_B::CpGiant_A_opt               | 3,925,066 | 3,891,571  | 1,536,088 | 39.14     | 39.47     | 0.938   | 0.880    | 0.324 | 0.525 | 13.4 |
| ERRBS_B::CpGiant_B_min               | 3,925,066 | 3,768,193  | 1,451,775 | 36.99     | 38.53     | 0.930   | 0.876    | 0.318 | 0.429 | 14.4 |
| ERRBS_B::TruSeqEpic                  | 3,925,066 | 3,835,967  | 1,453,058 | 37.02     | 37.88     | 0.932   | 0.823    | 0.477 | 0.685 | 13.1 |
| ERRBS_B::WGBS                        | 3,925,066 | 14,556,918 | 2,757,412 | 70.25     | 18.94     | 0.874   | 0.853    | 0.399 | 0.638 | 21.9 |
| SSMethylSeq_A_opt::SSMethylSeq_B_min | 3,811,508 | 3,578,188  | 3,507,660 | 92.03     | 98.03     | 0.981   | 0.936    | 0.242 | 0.328 | 7.69 |
| SSMethylSeq_A_opt::CpGiant_A_opt     | 3,811,508 | 3,891,571  | 2,831,455 | 74.29     | 72.76     | 0.983   | 0.934    | 0.250 | 0.476 | 7.22 |
| SSMethylSeq_A_opt::CpGiant_B_min     | 3,811,508 | 3,768,193  | 2,736,492 | 71.80     | 72.62     | 0.976   | 0.928    | 0.294 | 0.678 | 8.77 |
| SSMethylSeq_A_opt::TruSeqEpic        | 3,811,508 | 3,835,967  | 2,297,980 | 60.29     | 59.91     | 0.977   | 0.887    | 0.421 | 0.943 | 8.3  |
| SSMethylSeq_A_opt::WGBS              | 3,811,508 | 14,556,918 | 2,919,964 | 76.61     | 20.06     | 0.961   | 0.912    | 0.364 | 0.660 | 11.3 |
| SSMethylSeq_B_min::CpGiant_A_opt     | 3,578,188 | 3,891,571  | 2,711,795 | 75.79     | 69.68     | 0.981   | 0.929    | 0.256 | 0.421 | 7.75 |
| SSMethylSeq_B_min::CpGiant_B_min     | 3,578,188 | 3,768,193  | 2,626,281 | 73.40     | 69.70     | 0.973   | 0.923    | 0.284 | 0.546 | 9.17 |
| SSMethylSeq_B_min::TruSeqEpic        | 3,578,188 | 3,835,967  | 2,211,983 | 61.82     | 57.66     | 0.974   | 0.882    | 0.390 | 0.748 | 8.69 |
| SSMethylSeq_B_min::WGBS              | 3,578,188 | 14,556,918 | 2,761,518 | 77.18     | 18.97     | 0.958   | 0.908    | 0.348 | 0.567 | 11.7 |
| CpGiant_A_opt::CpGiant_B_min         | 3,891,571 | 3,768,193  | 3,580,110 | 92.00     | 95.01     | 0.975   | 0.942    | 0.171 | 0.240 | 8.93 |
| CpGiant_A_opt::TruSeqEpic            | 3,891,571 | 3,835,967  | 2,329,938 | 59.87     | 60.74     | 0.975   | 0.902    | 0.244 | 0.334 | 8.48 |
| CpGiant_A_opt::WGBS                  | 3,891,571 | 14,556,918 | 2,892,175 | 74.32     | 19.87     | 0.959   | 0.917    | 0.252 | 0.338 | 11.7 |
| CpGiant_B_min::TruSeqEpic            | 3,768,193 | 3,835,967  | 2,246,112 | 59.61     | 58.55     | 0.968   | 0.902    | 0.227 | 0.313 | 9.7  |
| CpGiant_B_min::WGBS                  | 3,768,193 | 14,556,918 | 2,799,116 | 74.28     | 19.23     | 0.950   | 0.911    | 0.236 | 0.313 | 12.8 |
| TruSeqEpic::WGBS                     | 3,835,967 | 14,556,918 | 2,777,296 | 72.40     | 19.08     | 0.950   | 0.905    | 0.283 | 0.375 | 12.7 |

**Figure S3.** Overlap of exon annotation of CpG-units as UpSet plot.

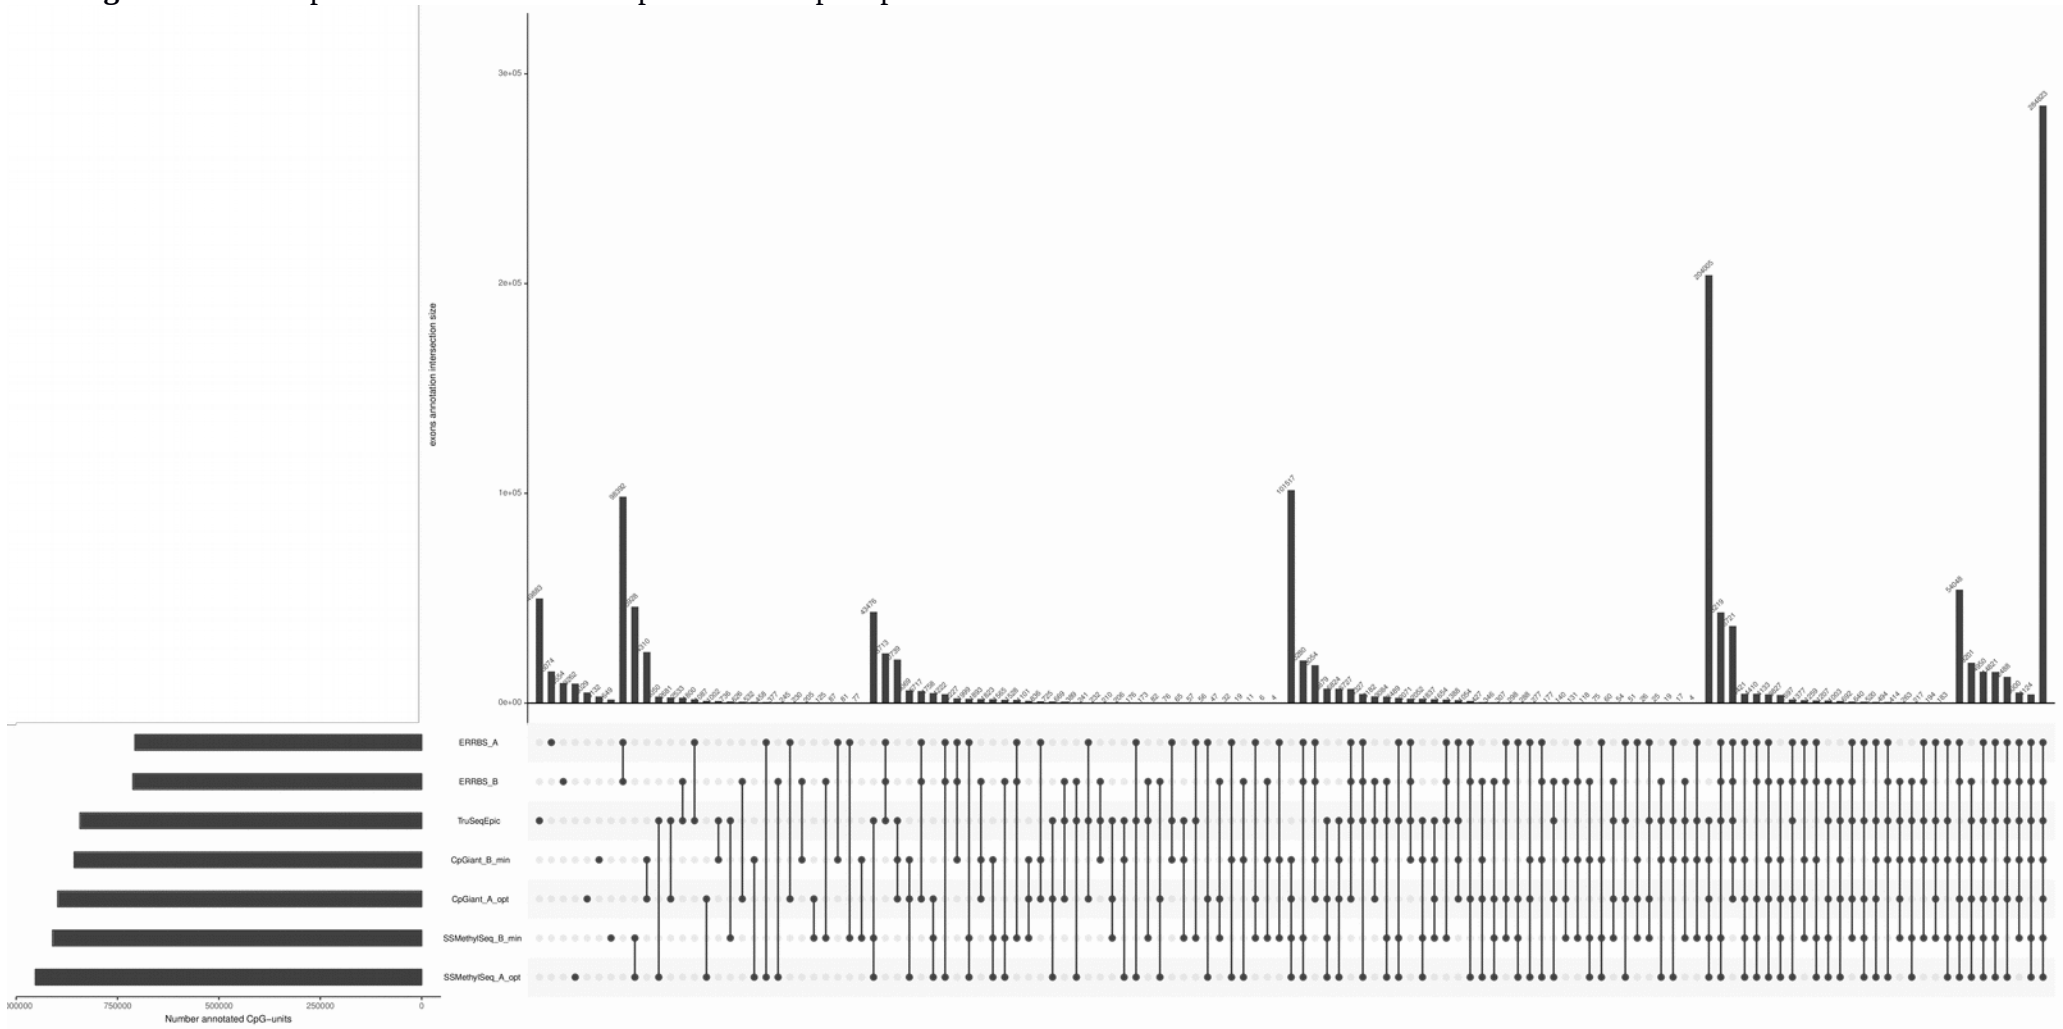

Figure S4. Overlap of intron annotation of CpG-units as UpSet plot.

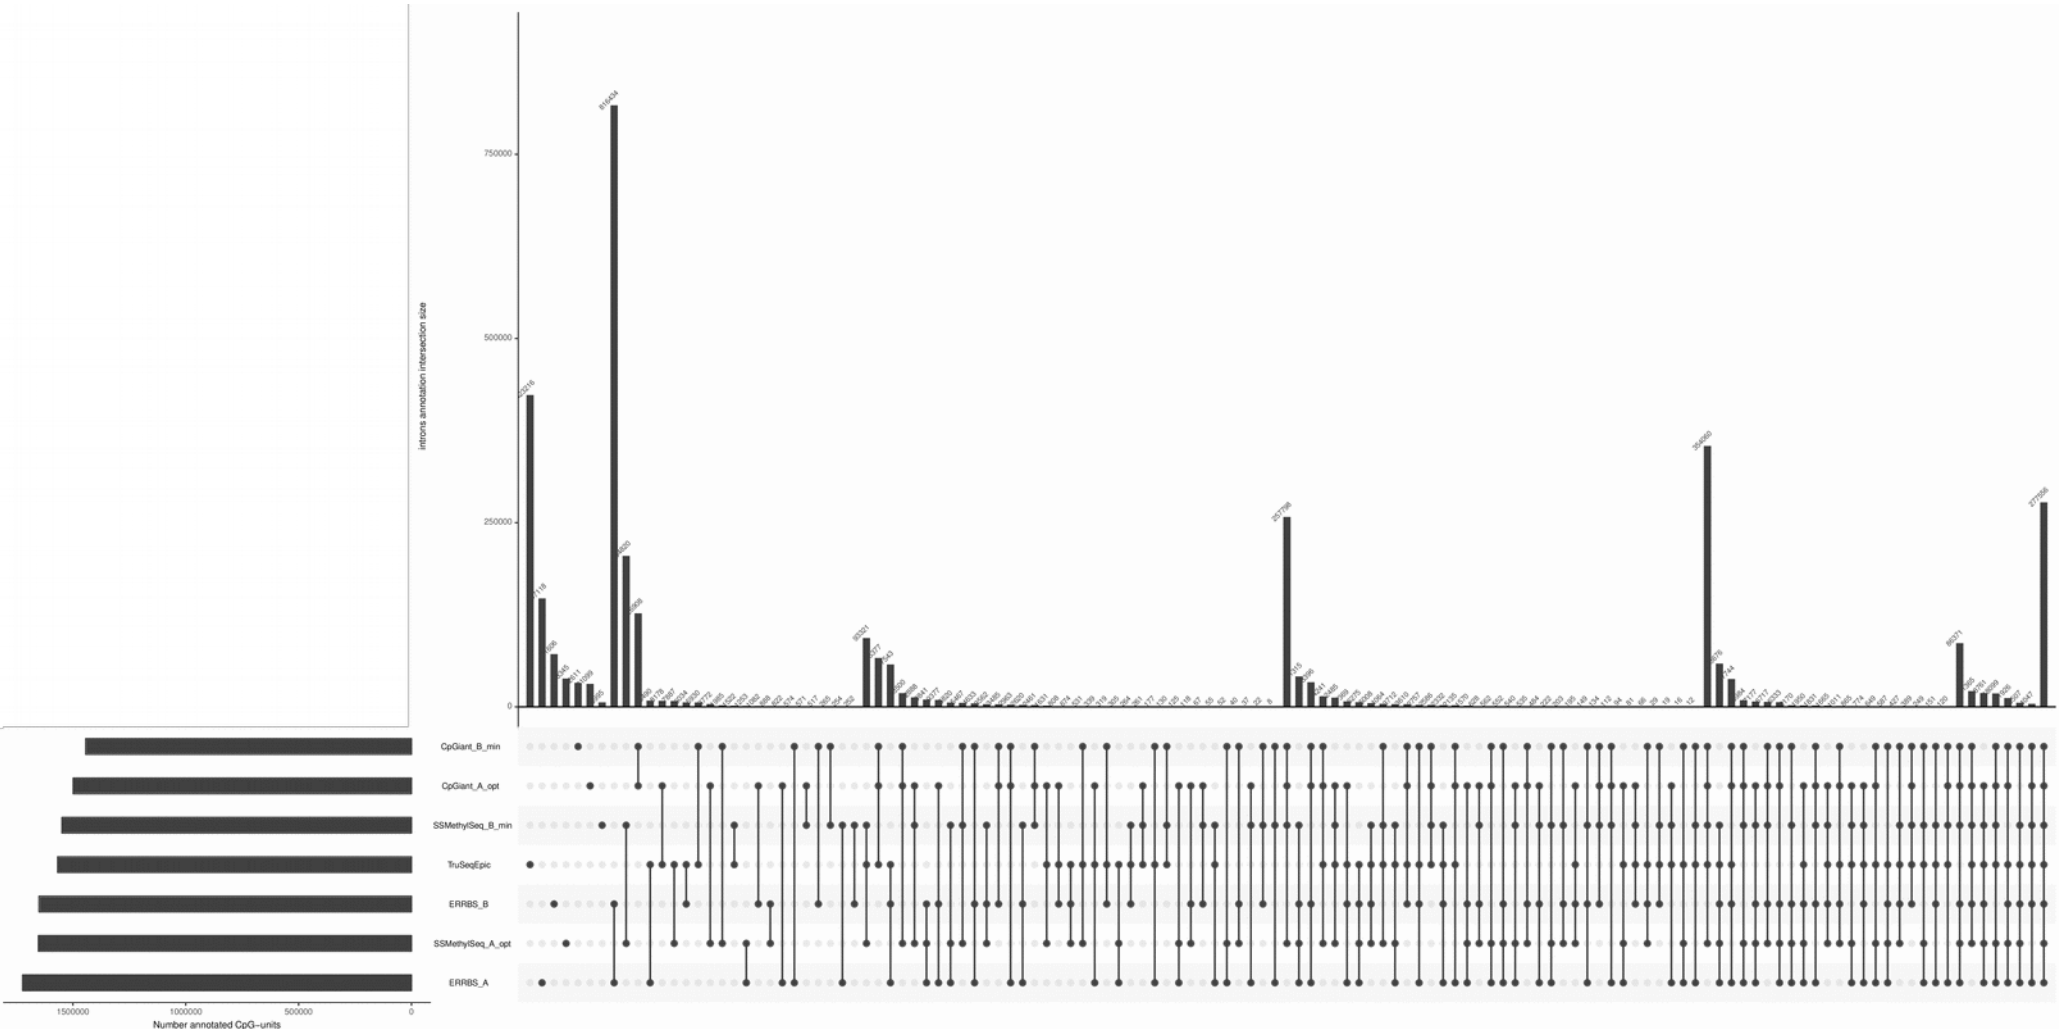



Figure S5. Overlap of promoters annotation of CpG-units as UpSet plot.

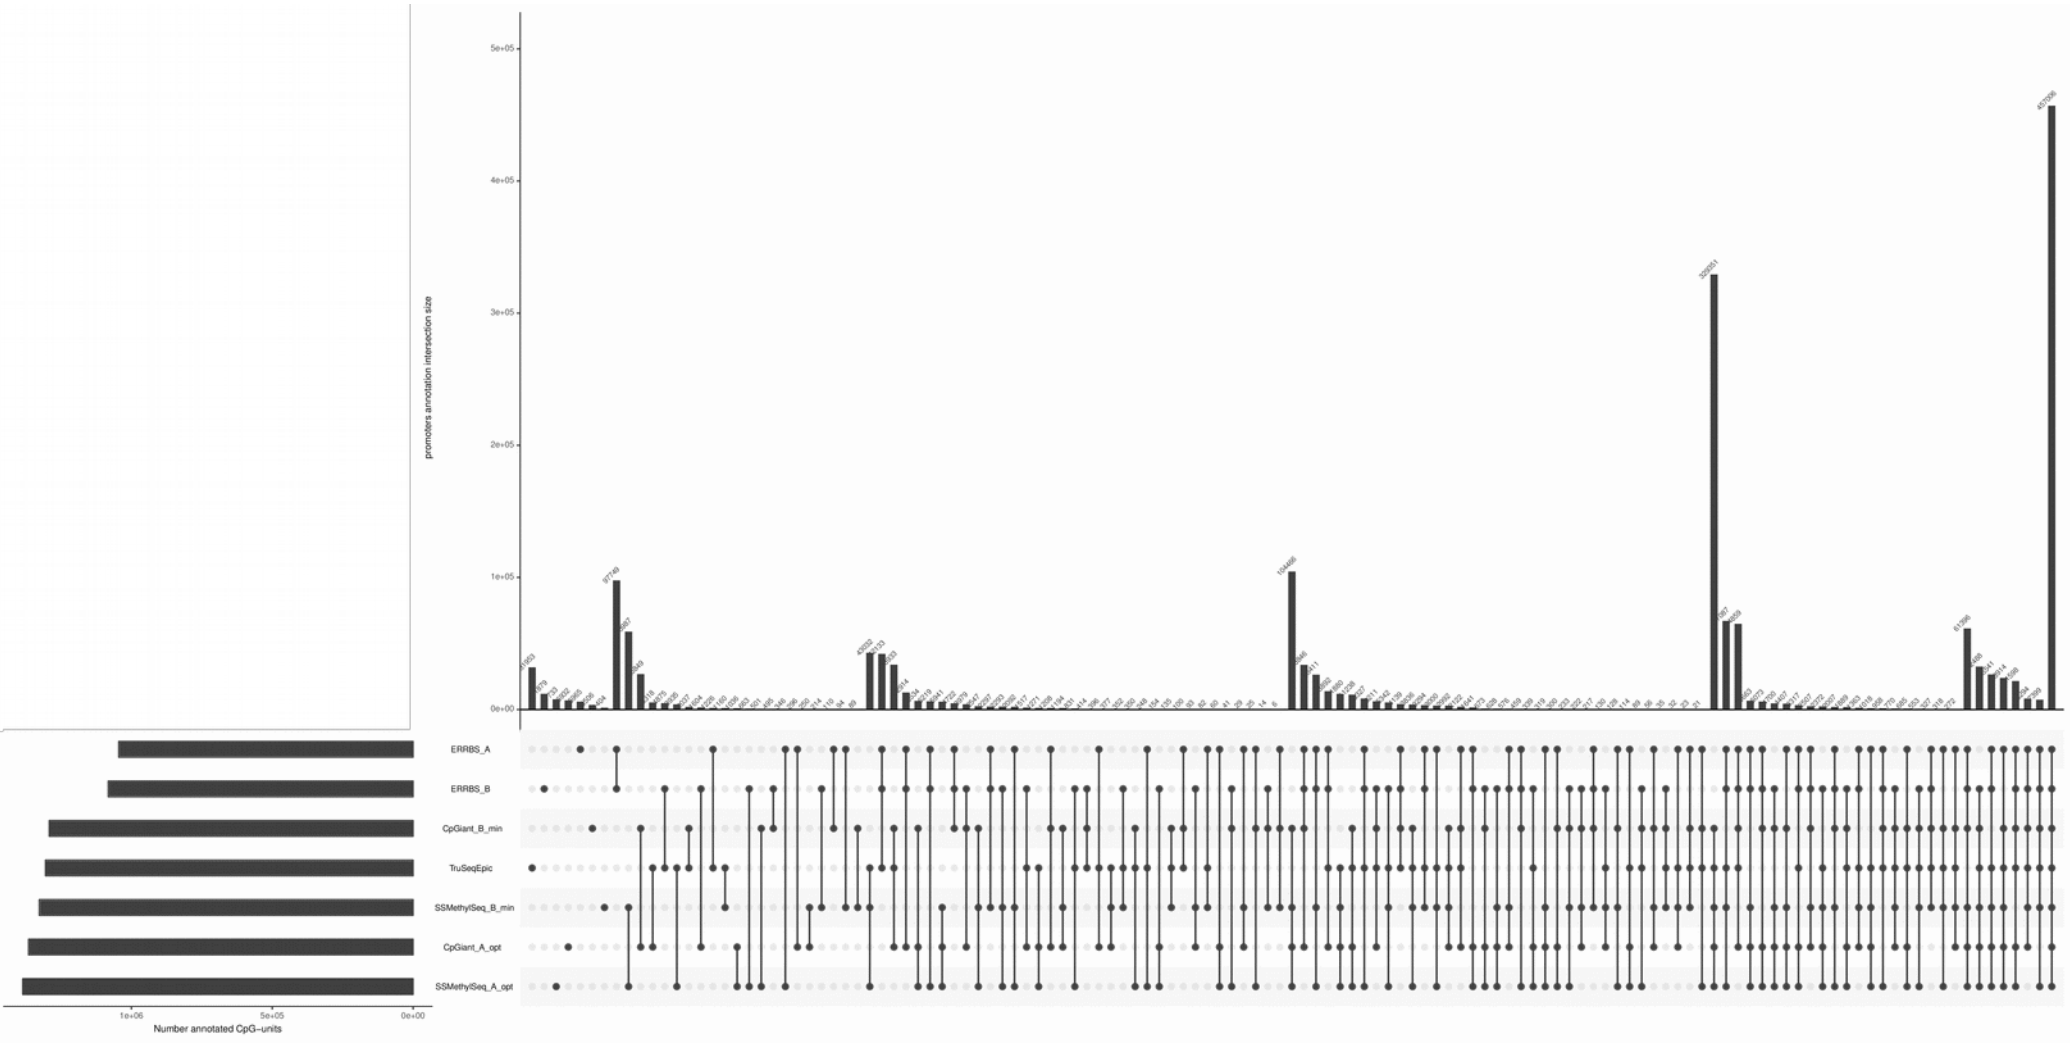

**Figure S6.** Overlap of CpG island annotation of CpG-units as UpSet plot.

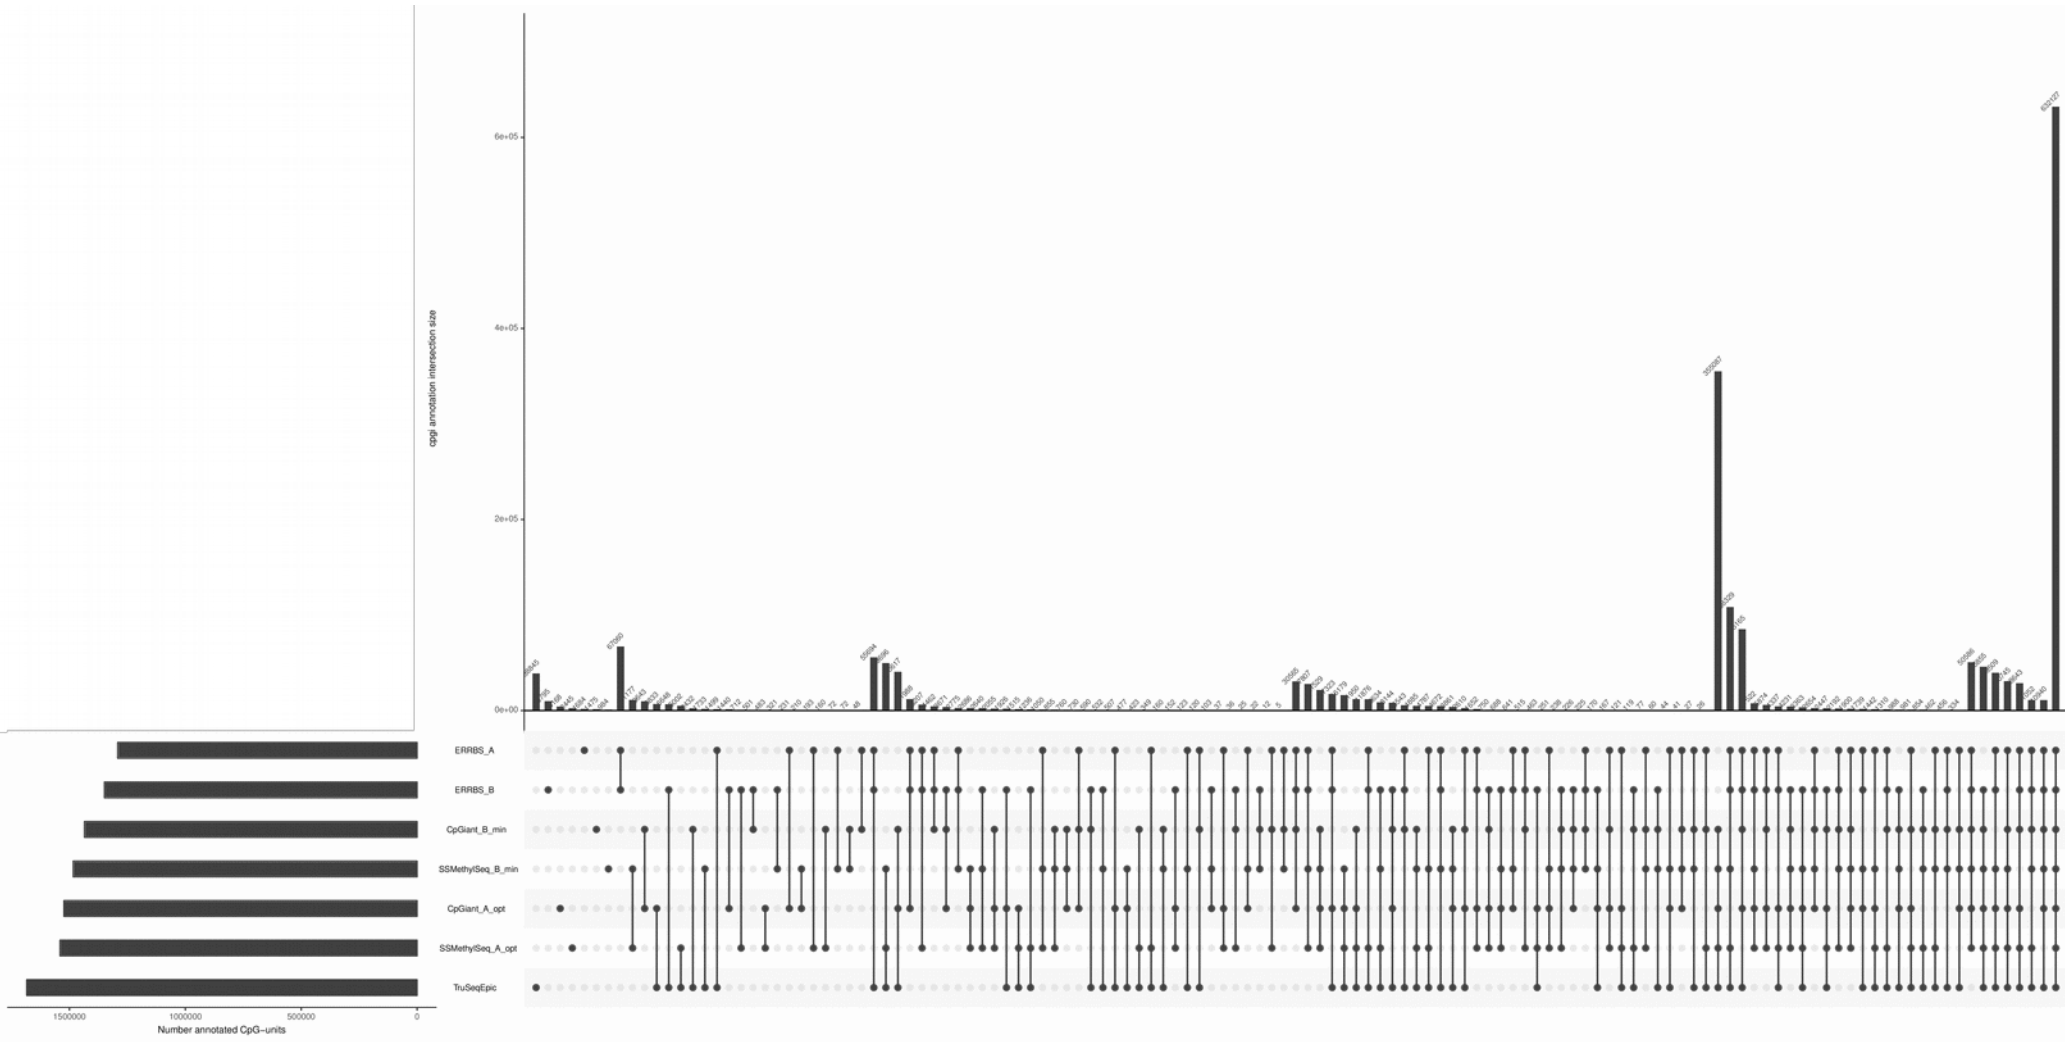



**Figure S8.** Overlap of unannotated CpG-units as UpSet plot.

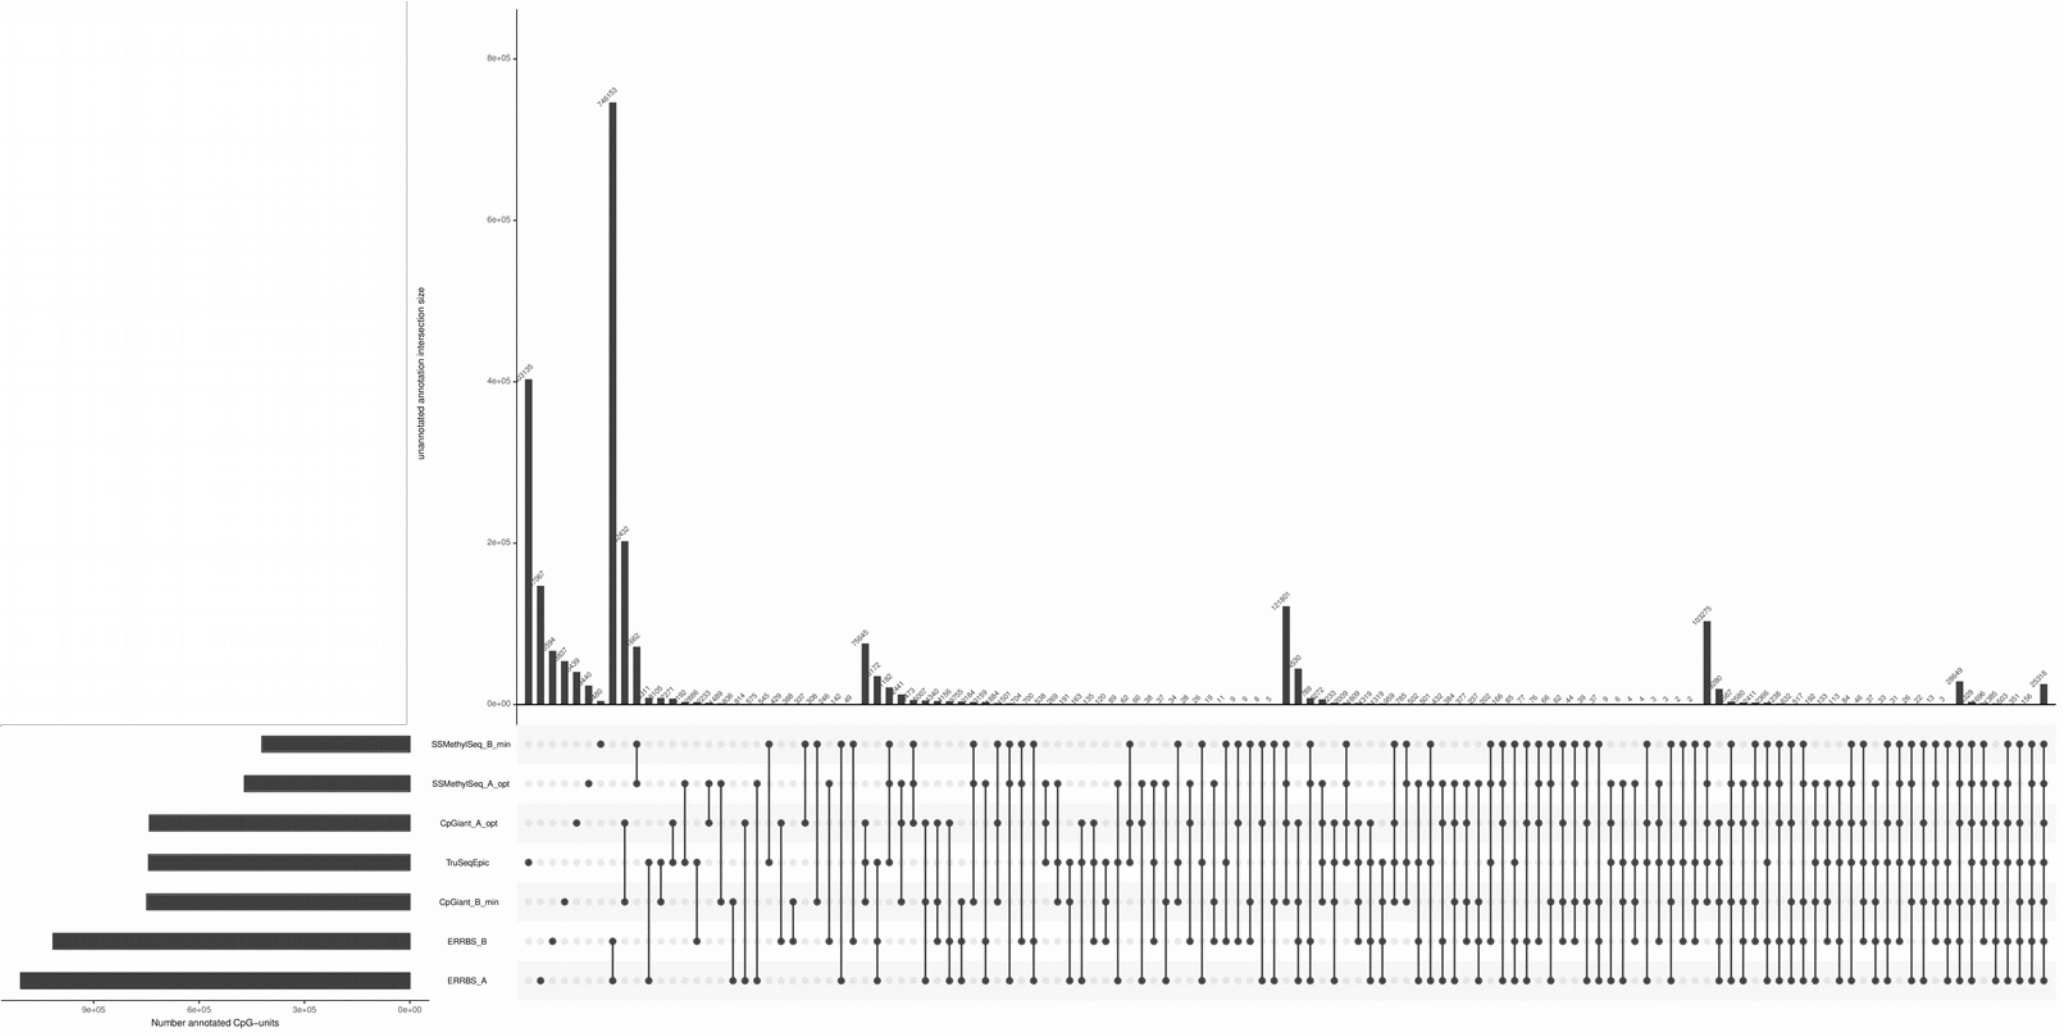

Supplement: 13072_2018_190_MOESM1_ESM.pdf [file 13072_2018_190_MOESM1_ESM.pdf]
